# Supplementary material for: Active counselling and well-controlled disease result in a higher percentage of women with rheumatoid arthritis that breast feed: results from the PreCARA study
Source: HighWire-hosted journal article supplement (doi:10.1136/rmdopen-2022-002194), 2022-06-01
Supplement: rmdopen-2022-002194supp001_data_supplement.pdf [file rmdopen-2022-002194supp001_data_supplement.pdf]

**Supplement Appendix for:**

Kemper E. et al., *Active counselling and well-controlled disease result in a higher percentage of women with rheumatoid arthritis that breastfeed; results from the PreCARA study*"

Supplemental figure 1. Breastfeeding rates (either partial or exclusive) at 4-6 weeks, 12 weeks, and 26 postpartum for the study population, the historical reference cohort, and the general population. For the general population, not all 32 532 participants were available at each time point: 18 928 participants were available at week 4-6, 18 620 at week 12, and 15 281 at week 26.

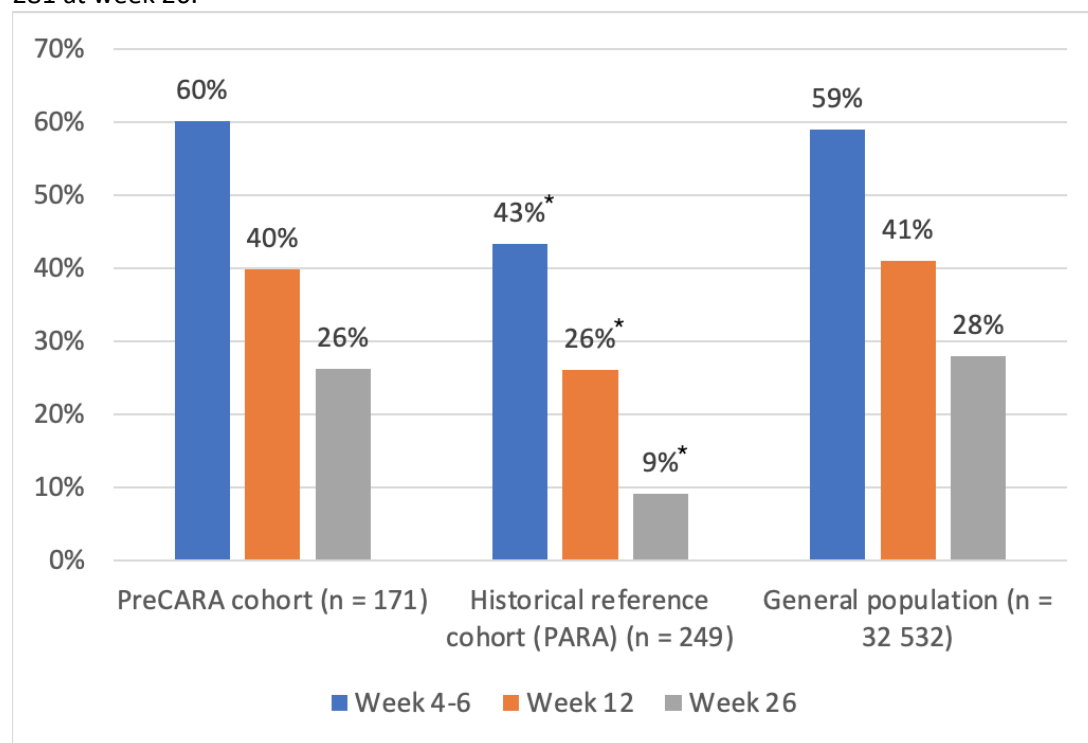

\*p-value < 0.001 compared with the PreCARA cohort.
